# Supplementary material
Source: PubMed Central journal article supplement (PMC5564291)
Supplement: NIHMS887288-supplement-Summary.pdf [file NIHMS887288-supplement-Summary.pdf]

**Cell, Volume 166**

**Supplemental Information**

**Phase Transition in Postsynaptic Densities  
Underlies Formation of Synaptic Complexes  
and Synaptic Plasticity**

**Menglong Zeng, Yuan Shang, Yoichi Araki, Tingfeng Guo, Richard L. Huganir, and Mingjie Zhang**

**Supplemental Table1. Data collection and refinement statistics of PSD-95 PDZ3-C/SynGAP PBM complex, related to Figure 1**

| <b>Data collection and processing</b>                              |                                 |
|--------------------------------------------------------------------|---------------------------------|
| Source                                                             | SSRF-BL17U                      |
| Wavelength(Å)                                                      | 0.9795                          |
| Space group                                                        | C 2 2 21                        |
| Unit cell(a,b,c,Å)                                                 | 70.286,71.094,115.791           |
| Unit cell( $\alpha,\beta,\gamma,\circ$ )                           | 90,90,90                        |
| Resolution range (Å)                                               | 50.00–2.90 (2.98 -2.90)         |
| No. of unique reflections                                          | 6482 (407)                      |
| Redundancy                                                         | 7.0 (7.1)                       |
| I/ $\sigma$ (I)                                                    | 43.3 (10.9)                     |
| Completeness (%)                                                   | 99.2 (99.3)                     |
| R <sub>merge</sub> (%) <sup>a</sup>                                | 6.8 (26.1)                      |
| <b>Structure refinement</b>                                        |                                 |
| Resolution (Å)                                                     | 35.55-2.90 (3.00-2.90)          |
| R <sub>work</sub> <sup>b</sup> /R <sub>free</sub> <sup>c</sup> (%) | 0.2397 (0.3196)/0.2866 (0.3946) |
| Rmsd bonds/angles (Å/ °)                                           | 0.017/1.87                      |
| Number of reflections                                              |                                 |
| Working set                                                        | 6641 (659)                      |
| Test set                                                           | 314 (36)                        |
| Number of Protein atoms                                            | 1777                            |
| Number of Water atoms                                              | 4                               |
| Average B factor (Å <sup>2</sup> )                                 | 79.2                            |
| Ramachandran plot(%)                                               |                                 |
| Most favored regions                                               | 95.6                            |
| Additionally allowed                                               | 4.4                             |
| Generously allowed                                                 | 0                               |

Numbers in parentheses represent the value for the highest resolution shell.

<sup>a</sup> R<sub>merge</sub> =  $\sum |I_i - I_m| / \sum I_i$ , where I<sub>i</sub> is the intensity of the measured reflection and I<sub>m</sub> is the mean intensity of all symmetry related reflections.

<sup>b</sup> R<sub>cryst</sub> =  $\sum ||F_{obs}| - |F_{calc}|| / \sum |F_{obs}|$ , where F<sub>obs</sub> and F<sub>calc</sub> are observed and calculated structure factors.

<sup>c</sup> R<sub>free</sub> =  $\sum T ||F_{obs}| - |F_{calc}|| / \sum T |F_{obs}|$ , where T is a test data set of about 5% of the total reflections randomly chosen and set aside prior to refinement.

**Supplemental Table 2. Data collection and refinement statistics of SynGAP coiled-coil domain, related to Figure 2**

| <b>Data collection and processing</b>                              |                                 |                           |                           |                           |
|--------------------------------------------------------------------|---------------------------------|---------------------------|---------------------------|---------------------------|
| Dataset                                                            | Native                          | SeMet                     |                           |                           |
| Space group                                                        | p21                             | p21                       |                           |                           |
| Unit cell (a,b,c,Å)                                                | 28.803, 236.664,<br>42.207      | 29.091, 230.209, 41.654   |                           |                           |
| Unit cell ( $\alpha,\beta,\gamma$ ,°)                              | 90.000, 96.922,<br>90.000       | 90.000, 91.921, 90.000    |                           |                           |
| Wavelength (Å)                                                     | 0.97886                         | 0.97949                   | 0.97930                   | 0.91162                   |
| Resolution range (Å)                                               | 50.00-2.50<br>(2.54-2.50)       | 50.00-2.80<br>(2.85-2.80) | 50.00-2.90<br>(2.95-2.90) | 50.00-3.00<br>(3.05-3.00) |
| No. of unique reflections                                          | 19240(958)                      | 13464(651)                | 11982(575)                | 10885(540)                |
| Redundancy                                                         | 3.8(3.8)                        | 6.1(6.3)                  | 5.9(6.2)                  | 5.0(5.2)                  |
| I/ $\sigma$                                                        | 22.8(2.7)                       | 36.5(4.7)                 | 33.5(7.6)                 | 31.6(4.6)                 |
| Completeness (%)                                                   | 99.7(100.0)                     | 99.8(100.0)               | 99.5(100.0)               | 99.8(100.0)               |
| Rmerge (%) <sup>a</sup>                                            | 7.3(60.9)                       | 7.6(48.5)                 | 8.2(36.0)                 | 7.8(48.8)                 |
| <b>Structure refinement</b>                                        |                                 |                           |                           |                           |
| Resolution, Å                                                      | 39.00-2.50(2.59-2.50)           |                           |                           |                           |
| R <sub>work</sub> <sup>b</sup> /R <sub>free</sub> <sup>c</sup> (%) | 0.2229 (0.2973)/0.3070 (0.3693) |                           |                           |                           |
| Rmsd bonds/angles<br>(Å/°)                                         | 0.008/0.97                      |                           |                           |                           |
| Average B factor (Å <sup>2</sup> )                                 | 65.67                           |                           |                           |                           |
| No. of protein atoms                                               | 3804                            |                           |                           |                           |
| No. of water molecules                                             | 36                              |                           |                           |                           |
| No. of reflections                                                 |                                 |                           |                           |                           |
| Working set                                                        | 19058 (1875)                    |                           |                           |                           |
| Test set                                                           | 973 (100)                       |                           |                           |                           |
| Ramachandran plot (%)                                              |                                 |                           |                           |                           |
| Favored regions                                                    | 99.58                           |                           |                           |                           |
| Allowed regions                                                    | 0.42                            |                           |                           |                           |
| Outliers                                                           | 0                               |                           |                           |                           |

Numbers in parentheses represent the value for the highest resolution shell.

<sup>a</sup>  $R_{\text{merge}} = \sum |I_i - \bar{I}| / \sum I_i$ , where  $I_i$  is the intensity of the measured reflection and  $\bar{I}$  is the mean intensity of all symmetry related reflections.

<sup>b</sup>  $R_{\text{cryst}} = \sum ||F_{\text{obs}}| - |F_{\text{calc}}|| / \sum |F_{\text{obs}}|$ , where  $F_{\text{obs}}$  and  $F_{\text{calc}}$  are observed and calculated structure factors.

<sup>c</sup>  $R_{\text{free}} = \sum T ||F_{\text{obs}}| - |F_{\text{calc}}|| / \sum T |F_{\text{obs}}|$ , where T is a test data set of about 5% of the total reflections randomly chosen and set aside prior to refinement.
